# Supplementary material for: The mineralization characteristics of organic carbon and particle composition analysis in reconstructed soil with different proportions of soft rock and sand
Source: PeerJ. 2019 Sep 16;7:e7707. doi: 10.7717/peerj.7707 (PMC6752185; doi:10.7717/peerj.7707)
Supplement: Data S5 — CK: the volume ratio of soft rock to sand is 0:1; C1: the volume ratio of soft rock to sand is 1:5; C2: the volume ratio of soft rock to sand is 1:2; C3: the volume ratio of soft rock to sand is 1:1. [file peerj-07-7707-s005.xlsx]

## Sheet: Sheet1
Organic carbon mineralization rate (mg/kg·d)
Treatment	Repeat	1d	2d	3d	4d	5d	8d	11d	14d	18d	22d	26d	30d
CK	PS21-1	23.4667	35.9333	44.286	31.218	4.356	8.228	4.114	3.388	2.541	3.8115	1.97633	2.33567
	PS21-2	33	41.0667	55.176	2.904	71.148	7.39267	7.26	6.292	1.452	1.9965	2.695	5.03067
	PS21-3	27.8667	27.8667	49.368	16.698	37.752	4.356	5.566	4.84	6.534	5.082	5.39	2.87467
	Mean	28.1111	34.9556	49.61	16.94	37.752	6.66	5.64667	4.84	3.51	3.63	3.35378	3.41367
C1	PS22-1	64.5333	45.4667	60.258	27.588	40.656	17.4233	24.684	23.716	13.794	9.438	12.397	7.90533
	PS22-2	52.8	38.8667	39.204	39.93	7.986	2.904	6.776	12.584	11.4345	12.8865	4.312	1.617
	PS22-3	58.6667	41.8	49.368	33.396	23.958	19.844	4.356	6.05	12.5235	17.061	18.5057	21.021
	Mean	58.6667	42.0444	49.61	33.638	24.2	13.39	11.94	14.1167	12.585	13.1285	11.7382	10.1811
C2	PS23-1	68.9333	32.2667	41.382	21.054	22.506	10.406	9.922	14.762	15.609	11.979	1.2575	13.6547
	PS23-2	18.3333	33	10.164	25.41	37.752	17.666	24.7082	17.182	2.3595	8.349	13.295	8.26467
	PS23-3	43.2667	33.7333	25.41	23.232	29.766	14.036	19.602	15.972	8.8935	10.164	7.3675	1.97633
	Mean	43.5111	33	25.65	23.232	30.008	14.0367	18.0767	15.9733	8.955	10.164	7.30667	7.96522
C3	PS24-1	63.8	40.3333	88.572	31.218	49.368	41.866	29.524	25.168	18.6945	10.527	17.787	16.709
	PS24-2	47.6667	71.8667	43.56	48.642	63.16	34.606	19.36	25.652	20.691	30.855	15.2717	16.5293
	PS24-3	33	55.7333	66.066	39.93	55.9	38.236	24.442	30.976	19.602	20.691	6.28833	7.18667
	Mean	48.1556	55.9778	66.07	39.93	56.1427	38.2367	24.44	27.2667	19.6625	20.691	13.1157	13.475
		1	2	3	4	5	8	11	14	18	22	26	30
	CK	28.1111	34.9556	49.61	16.94	37.752	6.66	5.64667	4.84	3.51	3.63	3.35378	3.41367
	C1	58.6667	42.0444	49.61	33.638	24.2	13.39	11.94	14.1167	12.585	13.1285	11.7382	10.1811
	C2	43.5111	33	25.65	23.232	30.008	14.0367	18.0767	15.9733	8.955	10.164	7.30667	7.96522
	C3	48.1556	55.9778	66.07	39.93	56.1427	38.2367	24.44	27.2667	19.6625	20.691	13.1157	13.475
			Treatments	Regression equation			r
			CK	y = -12.10ln(x) + 41.28_x000b__x000b_			0.7933**
			C1	y = -14.56ln(x) + 54.378_x000b__x000b_			0.9298**
			C2	y = -10.06ln(x) + 40.408_x000b_			0.9595**
			C3	y = -14.40ln(x) + 64.713			0.8679**
		Note: y: CO2 production rate, mg kg-1 d-1; x: Incubation day, d; ** means significant correlation at 0.01 level. The same below
