# Supplementary material for: The mineralization characteristics of organic carbon and particle composition analysis in reconstructed soil with different proportions of soft rock and sand
Source: PeerJ. 2019 Sep 16;7:e7707. doi: 10.7717/peerj.7707 (PMC6752185; doi:10.7717/peerj.7707)
Supplement: Data S6 — CK: the volume ratio of soft rock to sand is 0:1; C1: the volume ratio of soft rock to sand is 1:5; C2: the volume ratio of soft rock to sand is 1:2; C3: the volume ratio of soft rock to sand is 1:1. [file peerj-07-7707-s006.xlsx]

## Sheet: Sheet1
Organic carbon mineralization (mg/kg)
Treatment	Repeat	1d	2d	3d	4d	5d	8d	11d	14d	18d	22d	26d	30d
CK	PS21-1	23.4667	35.9333	44.286	31.218	4.356	24.684	12.342	10.164	10.164	15.246	7.90533	9.34267
	PS21-2	33	41.0667	55.176	2.904	71.148	22.178	21.78	18.876	5.808	7.986	10.78	20.1227
	PS21-3	27.8667	27.8667	49.368	16.698	37.752	13.068	16.698	14.52	26.136	20.328	21.56	11.4987
	Mean	28.1111	34.9556	49.61	16.94	37.752	19.98	16.94	14.52	14.04	14.52	13.4151	13.6547
C1	PS22-1	64.5333	45.4667	60.258	27.588	40.656	52.27	74.052	71.148	55.176	37.752	49.588	31.6213
	PS22-2	52.8	38.8667	39.204	39.93	7.986	8.712	20.328	37.752	45.738	51.546	17.248	6.468
	PS22-3	58.6667	41.8	49.368	33.396	23.958	59.532	13.068	18.15	50.094	68.244	74.0227	84.084
	Mean	58.6667	42.0444	49.61	33.638	24.2	40.17	35.82	42.35	50.34	52.514	46.9529	40.7244
C2	PS23-1	68.9333	32.2667	41.382	21.054	22.506	31.218	29.766	44.286	62.436	47.916	5.03	54.6187
	PS23-2	18.3333	33	10.164	25.41	37.752	52.998	74.1246	51.546	9.438	33.396	53.18	33.0587
	PS23-3	43.2667	33.7333	25.41	23.232	29.766	42.108	58.806	47.916	35.574	40.656	29.47	7.90533
	Mean	43.5111	33	25.65	23.232	30.008	42.11	54.23	47.92	35.82	40.656	29.2267	31.8609
C3	PS24-1	63.8	40.3333	88.572	31.218	49.368	125.598	88.572	75.504	74.778	42.108	71.148	66.836
	PS24-2	47.6667	71.8667	43.56	48.642	63.16	103.818	58.08	76.956	82.764	123.42	61.0867	66.1173
	PS24-3	33	55.7333	66.066	39.93	55.9	114.708	73.326	92.928	78.408	82.764	25.1533	28.7467
	Mean	48.1556	55.9778	66.07	39.93	56.1427	114.71	73.32	81.8	78.65	82.764	52.4627	53.9
		1	2	3	4	5	8	11	14	18	22	26	30
	CK	28.1111	63.0667	112.677	129.617	167.369	187.349	204.289	218.809	232.849	247.369	260.784	274.438
	C1	58.6667	100.711	150.321	183.959	208.159	248.329	284.149	326.499	376.839	429.353	476.306	517.03
	C2	43.5111	76.5111	102.161	125.393	155.401	197.511	251.741	299.661	335.481	376.137	405.364	437.225
	C3	48.1556	104.133	170.203	210.133	266.276	380.986	454.306	536.106	614.756	697.52	749.983	803.883
				Treatments	Regression equation			r
				CK	y = 71.928ln(x) + 30.107_x000b__x000b__x000b_			0.9935**
				C1	y = 132.4ln(x) + 9.2284_x000b__x000b__x000b_			0.9752**
				C2	y = 121.5ln(x) - 14.676_x000b_			0.9757**
				C3	y = 234.98ln(x) - 60.922_x000b_			0.9795**
			Note: y: CO2 production rate, mg kg-1 d-1; x: Incubation day, d; ** means significant correlation at 0.01 level. The same below
	Treatment	Repeat 1	Repeat 2	Repeat 3	Mean	Standard deviation	5% significant
	CK	229.108	310.825	283.36	274.431	41.5839	c
	C1	610.109	366.579	574.383	517.024	131.508	b
	C2	461.413	432.401	417.843	437.219	22.1807	b
	C3	817.835	847.137	746.663	803.879	51.6706	a
