# Supplementary material for: The mineralization characteristics of organic carbon and particle composition analysis in reconstructed soil with different proportions of soft rock and sand
Source: PeerJ. 2019 Sep 16;7:e7707. doi: 10.7717/peerj.7707 (PMC6752185; doi:10.7717/peerj.7707)
Supplement: Data S9 — CK: the volume ratio of soft rock to sand is 0:1; C1: the volume ratio of soft rock to sand is 1:5; C2: the volume ratio of soft rock to sand is 1:2; C3: the volume ratio of soft rock to sand is 1:1. Lowercase letters indicate significant differences (at 0.05 level) in the same particle composition between treatments. [file peerj-07-7707-s009.xlsx]

## Sheet: Texture
Sand
CK	80.5225	83.5	83.7669		Treatment	Sand (%)	Silt(%)	Clay (%)	Texture
C1	49.5317	51.62	60.6729		CK	86.60±1.04 a	11.12±0.01 b	2.28±0.14 b	Sand
C2	29.5223	62.2073	40.6451		C1	53.26±3.42 b	40.00±4.53 a	6.74±0.90 a	Sandy loam
C3	55.2112	36.348	31.7429		C2	44.12±7.59 b	46.60±4.29 a	9.28±1.25 a	Loam
Silt					C3	40.20±5.18 b	50.28±3.05 a	9.52±0.44 a	Silt loam
CK	13.5335	13.5333	13.5335			Sand	Silt	Clay	Standard deviation
C1	48.4115	38.7054	32.8772		CK	86.6	11.12	2.28	1.04	0.01	0.14
C2	59.4953	31.1081	49.1441		C1	53.26	40	6.74	3.42	4.53	0.9
C3	46.4397	53.2726	56.8219		C2	44.12	46.6	9.28	7.59	4.29	1.25
					C3	40.2	50.28	9.52	5.18	3.05	0.44
Clay
CK	2.5443	2.22121	2.07464
C1	8.98345	10.1501	7.07483			2.28	86.6
C2	10.6377	6.68451	10.2108			6.74	2.28	4.46
C3	9.96049	10.3794	11.4351			9.28	2.28	7
						9.52	2.28	7.24
